## 1 Selection and gene flow define polygenic barriers between incipient butterfly species

2  
3 Steven M. Van Belleghem<sup>1\*</sup>, Jared M. Cole<sup>2,3</sup>, Gabriela Montejó-Kovacevich<sup>4</sup>, Caroline N. Bacquet<sup>5</sup>, W.  
4 Owen McMillan<sup>6</sup>, Riccardo Papa<sup>1,7</sup> and Brian A. Counterman<sup>2+</sup>  
5

6 <sup>1</sup>Department of Biology, University of Puerto Rico, Rio Piedras, Puerto Rico.

7 <sup>2</sup>Department of Biological Sciences, Mississippi State University, Mississippi State, USA.

8 <sup>3</sup>Department of Integrative Biology, University of Texas at Austin, Austin, Texas, USA.

9 <sup>4</sup>Department of Zoology, University of Cambridge, Cambridge, UK.

10 <sup>5</sup>Universidad Regional Amazonica Ikiam, Tena, Ecuador.

11 <sup>6</sup>Smithsonian Tropical Research Institute, Panamá, Panama.

12 <sup>7</sup>Molecular Sciences and Research Center, University of Puerto Rico, San Juan, PR.  
13

14 \*e-mail: [Steven.Van@upr.edu](mailto:Steven.Van@upr.edu)

15 +e-mail: [BCounterman@biology.msstate.edu](mailto:BCounterman@biology.msstate.edu)  
16

### 17 Abstract

18 Characterizing the genetic architecture of species boundaries remains a difficult task.  
19 Hybridizing species provide a powerful system to identify the factors that shape genomic variation and,  
20 ultimately, identify the regions of the genome that maintain species boundaries. Unfortunately, complex  
21 histories of isolation, admixture and selection can generate heterogenous genomic landscapes of  
22 divergence which make inferences about the regions that are responsible for species boundaries  
23 problematic. However, as the signal of admixture and selection on genomic loci varies with  
24 recombination rate, their relationship can be used to infer their relative importance during speciation.  
25 Here, we explore patterns of genomic divergence, admixture and recombination rate among hybridizing  
26 lineages across the *Heliconius erato* radiation. We focus on the incipient species, *H. erato* and *H. himera*,  
27 and distinguish the processes that drive genomic divergence across three contact zones where they  
28 frequently hybridize. Using demographic modeling and simulations, we infer that periods of isolation  
29 and selection have been major causes of genome-wide correlation patterns between recombination  
30 rate and divergence between these incipient species. Upon secondary contact, we found surprisingly  
31 highly asymmetrical introgression between the species pair, with a paucity of *H. erato* alleles  
32 introgressing into the *H. himera* genomes. We suggest that this signal may result from a current  
33 polygenic species boundary between the hybridizing lineages. These results contribute to a growing  
34 appreciation for the importance of polygenic architectures of species boundaries and pervasive genome-  
35 wide selection during the early stages of speciation with gene flow.

## 36 Introduction

37 Disentangling the factors that drive genomic divergence is necessary for advancing our  
38 understanding of speciation. Targets of selection, for example, may be responsible for adaptive  
39 differences between species; and their number, distribution and effect on gene flow along the genome  
40 define the architecture of species boundaries. In population genomic studies, targets of selection are  
41 expected to show elevated divergence between species and reduced genetic diversity within species [1].  
42 These highly divergent loci often reflect local adaptation and/or incompatibilities between species, and  
43 can be considered the loci that define the species [2,3]. This is because natural selection acts as a local  
44 genomic “barrier” to gene flow between hybridizing species [4–6]. In contrast, the rest of the genome,  
45 which is not under such selective pressures, may be expected to exchange more freely between the  
46 species (i.e. admixture). However, genetic variation at these latter genomic regions can be greatly  
47 impacted by neutral demographic processes (i.e. population size and migration) and the indirect effects  
48 of nearby targets of selection (i.e. linked selection). Local recombination rates can further influence how  
49 these processes impact genetic variation, which collectively result in highly heterogenous patterns of  
50 genome-wide divergence [1,4,7–10]. Thus, the challenge is to distinguish those targets of selection and  
51 demographic processes that generate the genomic landscape of divergence.

52 Here, we reconstruct the history of demographic isolation and characterize the extent to which  
53 selection has shaped genomic divergence between two closely related, hybridizing *Heliconius* species.  
54 More precisely, we first use a demographic modeling approach to reconstruct the history of population  
55 sizes and isolation during divergence of these species [11–18]. Next, with knowledge of the most likely  
56 demographic history, we use coalescent simulations to test for the importance of selection as the  
57 underlying mechanism driving heterogeneous patterns of genomic divergence. The coalescent  
58 simulation approach allows us to explore other genomic factors, such as recombination rate, on  
59 genomic divergence. Specifically, we can test for genome-wide impacts of linked selection by using the  
60 expectation that linked selection is higher in regions of the genome where recombination rate is lower  
61 [19]. Hence, we would expect a negative association between recombination rate and divergence across  
62 the genome [8,9,20,21]. Similarly, we expect a positive association between recombination rate and  
63 admixture, if the species continue to hybridize [4,22], but not necessarily if they diverged in isolation  
64 [8,23]. Thus, the relationships of recombination rate with divergence and admixture can be used to infer  
65 the relative importance of different evolutionary processes during speciation.

66 To provide a relative perspective of the divergence between our focal hybridizing *Heliconius*  
67 species, we first investigate the relationship between reproductive isolation and genomic divergence  
68 across 15 pairs of increasingly divergent populations and species in the *H. erato* clade. Next, we use the  
69 incipient species *Heliconius erato* and *Heliconius himera* that hybridize across three geographically  
70 distinct contact zones to test for the relative contribution of demographic and selective factors in the  
71 evolution of the divergence landscape. *Heliconius himera* is found in dry forest areas of southern  
72 Ecuador and northern Peru [24]. It comes into contact with *Heliconius erato cyrba* on the western  
73 slopes of the Ecuadorian Andes and with *Heliconius erato favorinus* and *Heliconius erato emma* on the  
74 eastern slopes of the Andes, both areas with wet forest (Figure 1A). Hybridization is ongoing and hybrids  
75 are easily identifiable by their wing color patterns. In Ecuador, hybrids compose approximately 5% of the  
76 population in the contact zone [25], and, although poorly characterized, hybridization is known to occur  
77 in the other contact zones. The two species show strong premating isolation but little or no postmating  
78 reproductive barriers [25]. The eastern and western *H. erato* populations that hybridize with *H. himera*  
79 do not come into contact with each other and show deep genetic divergence in the *H. erato* clade [26].

80 Our findings demonstrate the importance of both isolation and selection in establishing the  
81 heterogeneous genomic landscape of divergence that characterizes our hybridizing species. The  
82 reconstructed demographic history supports a complex dynamics of population fluctuations and varying  
83 migration rates, that with selection, resulted in the observed heterogeneous patterns of genomic  
84 divergence. Further, our coalescent simulations well fit the observed relationship of genomic divergence  
85 and recombination when we consider genome-wide impacts of recent and strong selective events in the  
86 absence of gene flow. Finally, we show that the species boundary between *H. himera* and *H. erato* is  
87 highly porous and that gene flow is highly asymmetrical and distinct across each of the three contact  
88 zones. We suggest that this asymmetrical signal of gene flow may be the result of polygenic species  
89 boundaries that restrict introgression in *H. himera*. Overall, our results highlight that the study of  
90 heterogeneous landscapes of divergence can help us understand how demographic and selective  
91 processes drive speciation.

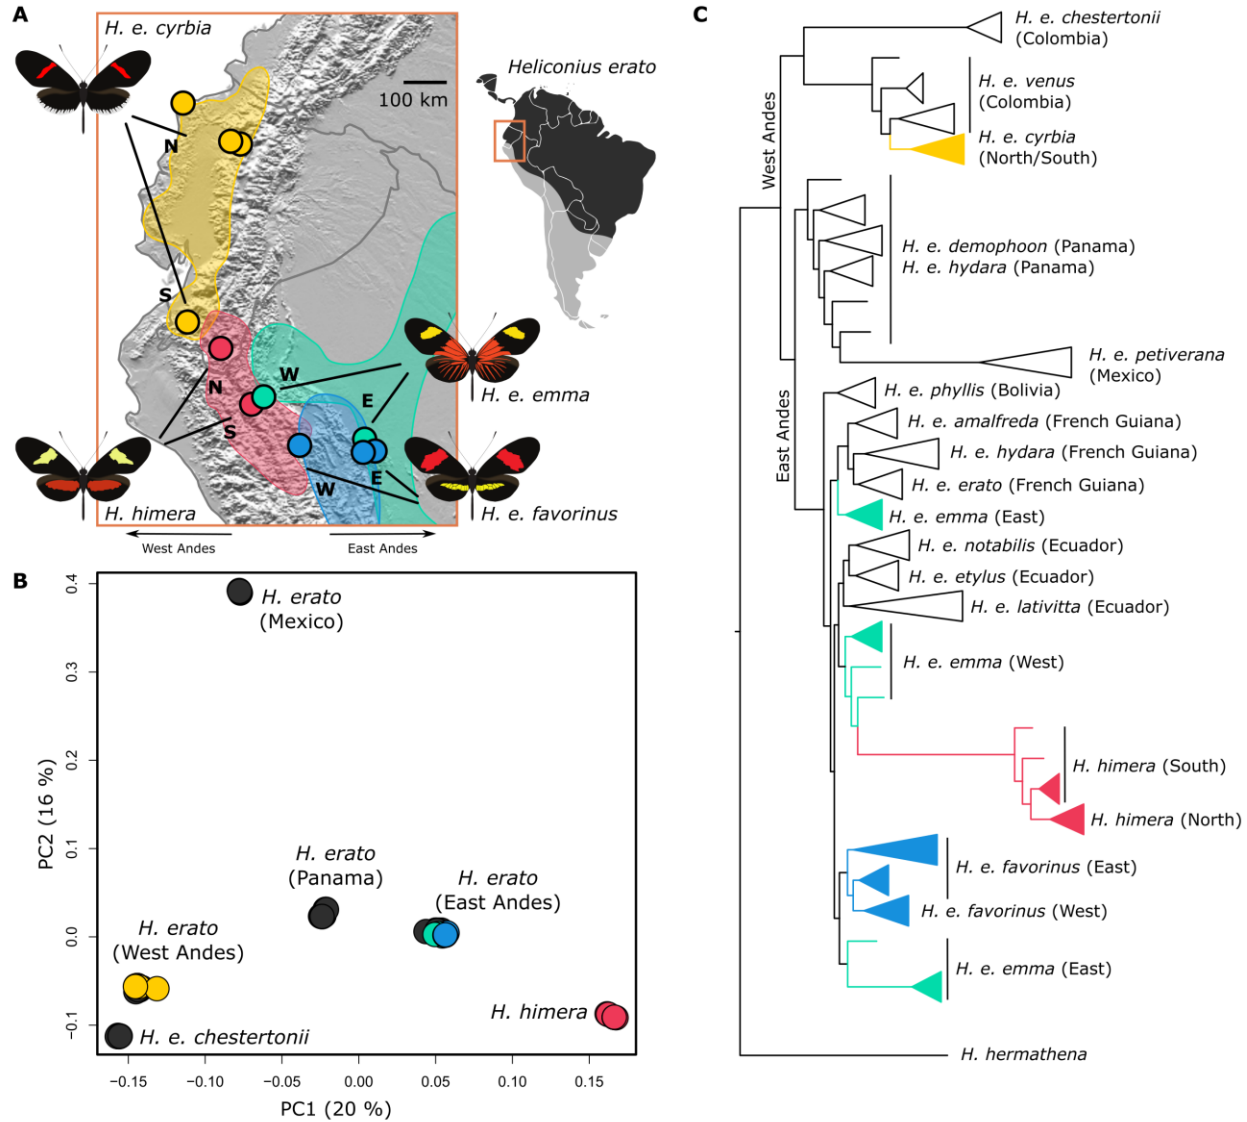

92

93 **Figure 1. Geographical distribution, population structure and phylogeny of the focal populations in relation to the *Heliconius***  
 94 ***erato* radiation. (A)** We sampled two populations of *H. himera*, *H. e. cyrbia*, *H. e. emma* and *H. e. favorinus*. The distribution of  
 95 *H. himera* (red) covers dry valleys in the Andes of South Ecuador and North Peru. In the North, *H. himera* (N) comes into contact  
 96 with a *H. e. cyrbia* (S) population. In the South, *H. himera* comes into contact with a *H. e. emma* (W) and *H. e. favorinus* (W)  
 97 population. **(B)** Principal Component Analysis (PCA) of the focal samples (colored points) among all the available whole genome  
 98 data for the *H. erato* radiation (black points). **(C)** Maximum likelihood tree built using FastTree and using only autosomal sites  
 99 from 121 whole genome resequenced individuals (see Figure S1 for the uncollapsed tree). Nodes in the tree that represent the  
 100 major clades within *H. erato* (east and west of Andes) obtained high support (= 1) from the Shimodaira-Hasegawa test.

101 **Results & discussion**

102 *Genomic landscape of divergence among hybridizing races and incipient species*

103 We first sought to describe the general patterns of genome-wide divergence and how they  
104 varied based on the varying degrees of reproductive isolation. To do this, we compared genome-wide  
105 patterns of divergence across 15 contact zones in the *H. erato* clade that have varying degrees of  
106 reproductive isolation (*RI*, Figure 2; Table S1). Correlations of *RI* with genome-wide estimates of relative  
107 divergence ( $F_{ST}$ ) show that divergently selected color patterns between hybridizing races of *H. erato* with  
108 absence of other pre- or post-mating barriers are not sufficient to drive genome-wide increases in  
109 divergence (Figure 2A). In these hybridizing *H. erato* races, there are only narrow peaks of divergence  
110 largely centered over the loci known to be responsible for color pattern differences (Figure 2B). In  
111 contrast, between the incipient species *H. erato cyrbia* and *H. himera*, which have strong differences in  
112 mate preference, divergence is much higher across the entire genome. Divergence between these  
113 species has increased to the extent that  $F_{ST}$  peaks near the known color pattern loci *WntA* (chr 10),  
114 *cortex* (chr 15), and *optix* (chr 18) are not detectable (Figure 2B). The *H. himera* and *H. erato* contact  
115 zones on the eastern Andes (*H. e. emma* and *H. e. favorinus*) also show elevated genome-wide  
116 divergence, but much lower overall than in the western Andes contact zone. As expected, genomic  
117 divergence was highest between *H. e. venus* and *H. e. chestertonii* from Colombia, where both mate  
118 preference and hybrid sterility have been reported [27]. We also note a dramatic increase in divergence  
119 on the Z chromosome relative to the autosomes (Figure 2). This is in line with previous work on *H. e.*  
120 *chestertonii*, which suggested the important role played by the Z chromosome as a barrier to gene flow  
121 [28].

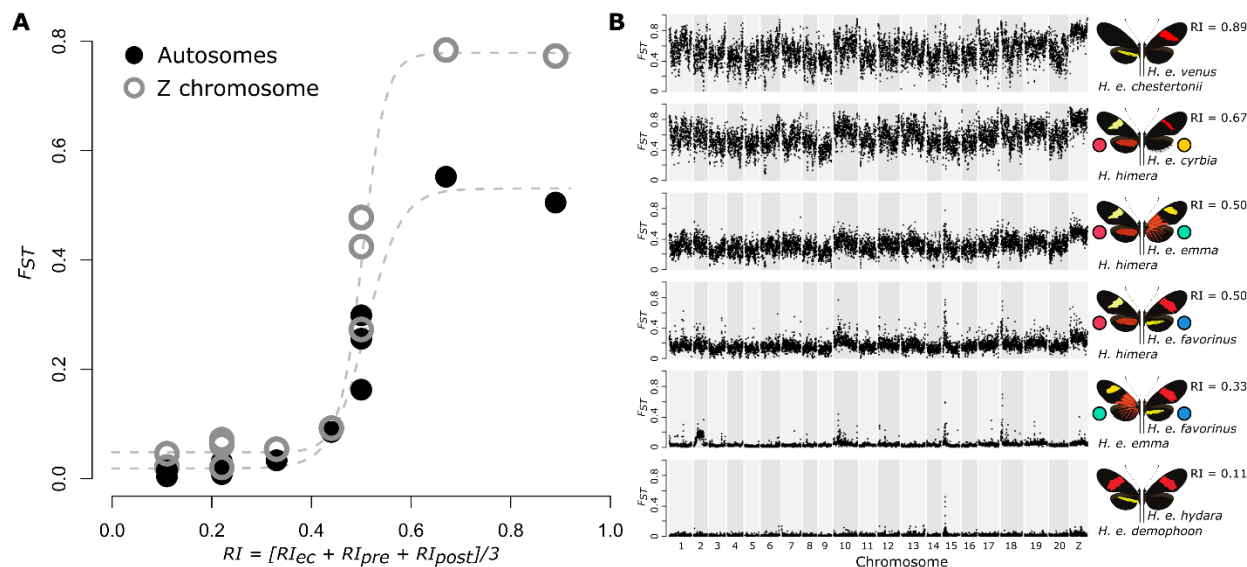

122

123 **Figure 2. Reproductive isolation and divergence among *Heliconius erato* populations.** (A) Genome-wide averages of relative  
 124 divergence ( $F_{ST}$ ) show a sharp increase with increasing measures of reproductive isolation between parapatric *H. erato*  
 125 populations. The measure of reproductive isolation ( $RI$ ) was obtained by equally weighting ecological ( $RI_{ec}$ ), pre-isolation ( $RI_{pre}$ )  
 126 and post-isolation ( $RI_{post}$ ) components (Table S1). Higher relative divergence on the Z chromosome can be observed for the  
 127 more divergent parapatric comparisons, however, incompatibilities that are potentially Z-linked have only been suggested for  
 128 *H. e. chesteronii* crosses [27,28]. (B) Plots of relative divergence (average  $F_{ST}$  in 50 kb windows) between parapatric *H. erato*  
 129 populations along the genome. Plots are ordered according to the measure of reproductive isolation ( $RI$ ). Colored circles match  
 130 color codes used for the focal populations in this study. Divergence peaks on chromosome 10, 15 and 18 correspond to the  
 131 divergently selected color pattern genes *WntA* (affecting forewing band shape), *cortex* (affecting yellow hindwing bar), and  
 132 *optix* (affecting red color pattern elements), respectively [26].

133

### 134 *Demographic change and selection jointly drive genomic divergence among incipient species*

135 Collectively, our results provide a view into the genomic landscape among lineages with  
 136 increasing degrees of reproductive isolation (Figure 2)[29,30]. However, the increase in divergence does  
 137 not seem to be a linear process as there is a marked increase in divergence between the incipient  
 138 species that are known to still frequently and continuously hybridize over many generations. To  
 139 understand what drives these elevated patterns of divergence, we have to recognize that each of these  
 140 contact zones reflect hybridization between evolutionary distinct lineages. In this regard, the genomic  
 141 landscapes do not reflect a continuum of genomic divergence throughout speciation, but rather they  
 142 each are the evolutionary outcomes of various neutral and adaptive processes that shaped each of the  
 143 populations coming into contact. For example, we find increased divergence between *H. himera* and *H.*  
 144 *erato* from the western Andes slopes compared to *H. erato* from eastern Andes slopes. As seen in the  
 145 PCA and phylogenetic inference, this results from a deeper split between *H. himera* and *H. e. cyrbia* from  
 146 the western Andes slope compared to *H. himera* and the *H. erato* races that are found east of the Andes,

147 including *H. e. emma* and *H. e. favorinus* (Figure 1B, C). This is consistent with previous studies that  
148 placed *H. himera* nested within the *H. erato* clade and not as a sister species to *H. erato* [26,31].

149 To understand what forces are likely driving differences in patterns of genome-wide divergence  
150 between *H. erato* and *H. himera*, we fit the estimated joint site-frequency spectrum (JSFS) for three  
151 geographically distinct contact zones to 26 alternative demographic scenarios that varied in split times,  
152 migration rates and population sizes (Figure 3). All three *H. erato* and *H. himera* contact zones best fit  
153 models that included secondary contact (SC) after a period of isolation without gene flow (Figure S2-3;  
154 Table S2). For all three zones we found support for asymmetrical migration. In each case, migration  
155 rates were predominantly in one direction, with on average 0.5 to 0.6 migrants per generation moving  
156 from *H. erato* into *H. himera*, compared to 0.07 to 0.13 moving from *H. himera* into *H. erato*. This result  
157 is consistent with the effective migration rates being driven by the marked population size differences  
158 between the two species (Figure 3B).

159 Nearly all the models that included exponential population growth (G) best fit the JSFS, with the  
160 exception of the *H. himera* and *H. e. emma* comparison. Estimates of ancestral and contemporary  
161 population sizes suggest strong expansions in *H. himera* and *H. erato*. These inferred changes in  
162 population sizes broadly fit previous results obtained from pairwise sequentially Markovian coalescent  
163 (PSMC) analysis (Van Belleghem et al. 2018), which suggested an overall population growth in *H. erato*  
164 east and west of the Andes in the past 1 My and size reduction for *H. himera* in the past 200 Ky (Figure  
165 S3). However, we found that estimates of contemporary population sizes varied greatly depending on  
166 the population comparison (Figure 3B, C), a result possibly explained by unaccounted population  
167 structure and difficulties in estimating growth (G). For *H. e. favorinus*, estimates of contemporary  
168 population size were generally much smaller than the ancestral population. This result fits the  
169 observation that *H. e. favorinus* is a smaller Andean population of the “postman” color pattern (i.e. red  
170 forewing band), which has a much larger distribution throughout the Neotropics. Collectively, the  
171 models support a history that includes periods of allopatry, followed by lineage specific changes in  
172 population size that coincide with more recent gene flow.

173 To investigate if the JSFS contained evidence of selection driving patterns of divergence across  
174 the contact zones, we incorporated heterogeneity in population size (2N) and migration rate (2M) into  
175 the models, similar to what was done by Rougeux *et al.* 2017 [32] and Tine *et al.* 2014 [16], respectively.  
176 The 2N model allows heterogeneity in population size estimates across loci that result from the  
177 differences in allelic variation caused by linked selection ( $l/s$  = effective population size of locus relative to



178 neutral loci;  $Q$  = proportion of the genome affected by  $I_s$ ). We found that all contact zones between *H.*  
179 *erato* and *H. himera* well supported 2N models, suggesting the effect of linked selection in shaping  
180 patterns of genomic variation and divergence between the incipient species. The strongest  $I_s$  was  
181 observed for the population comparisons of *H. erato* East and West ( $I_s = 0.10$ ;  $Q = 0.35$ ) and *H. himera*  
182 and *H. erato* West ( $I_s = 0.15$ ;  $Q = 0.90$ ) and the lowest observed between *H. e. emma* and *H. e. favorinus*  
183 ( $I_s = 0.07$ ;  $Q = 0.04$ ) (Figure 3C, Table S3).

184 The result of selection on locally adapted alleles is a heterogeneous landscape with regions  
185 containing these variants showing much lower rates of admixture compared to the rest of the genome.  
186 The 2M models allow for this type of heterogeneity in migration rates across the genome. Both contact  
187 zones in the eastern Andes supported these models for *H. himera* and *H. erato*, suggesting that the  
188 model fits the eastern Andean populations having genomic regions with much lower rates of  
189 introgression than other parts of the genome.



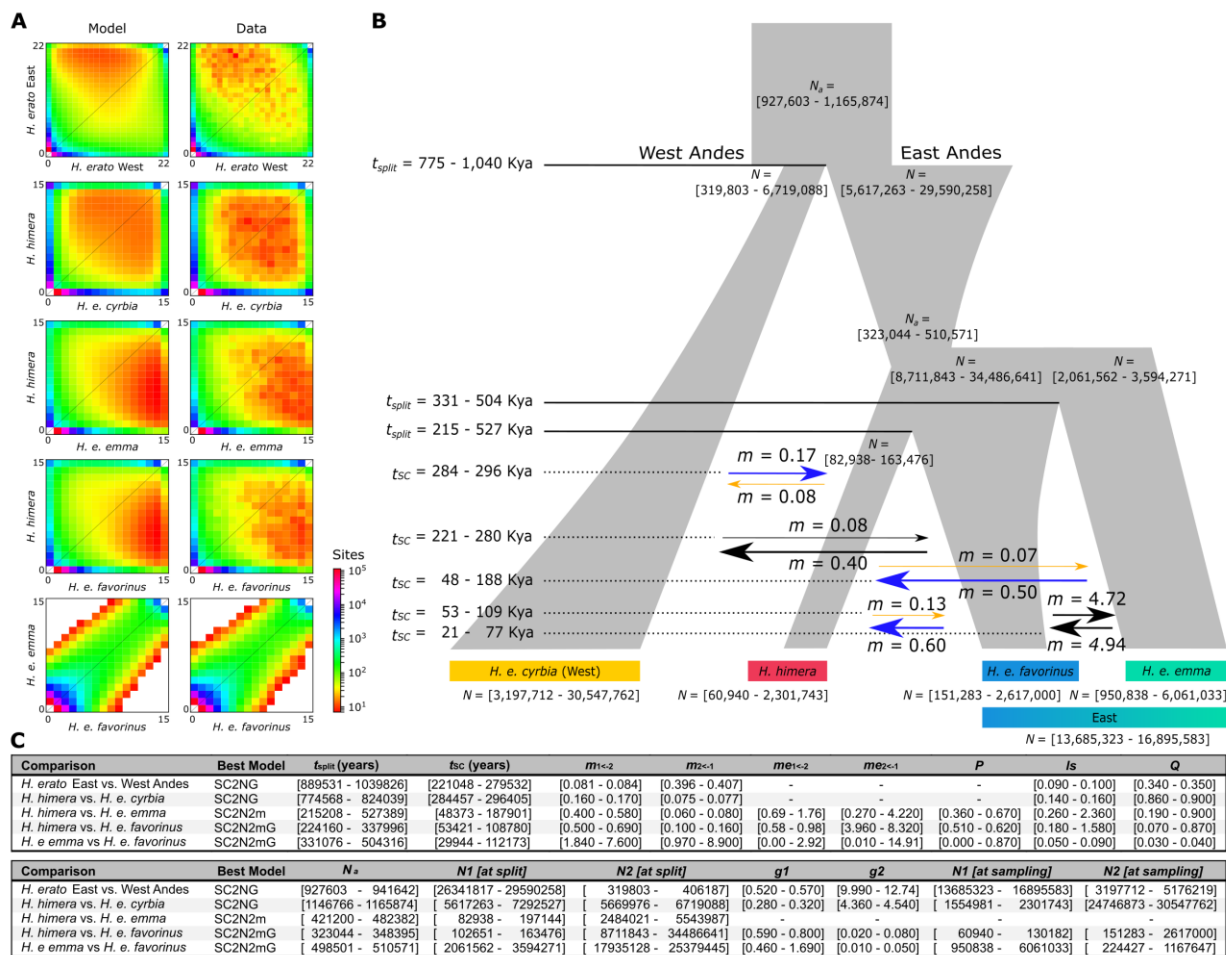

190

191 **Figure 3. Secondary Contact (SC) best demographic model of the *H. himera* and *H. erato* population history.** (A) Joint Site  
 192 Frequency Spectra (JSFS) for data and best model (see Table S2 and Figure S3-4 for AIC values (Akaike Information Criterion)).  
 193 (B) Reconstruction of historical demography of *H. himera* and *H. erato* populations using models with best AIC scores. All best  
 194 models included a period of isolation and secondary contact. Arrows indicate effective migration rates ( $2N_e m$ ). Migration from  
 195 *H. himera* into *H. erato* is indicated in orange, migration from *H. erato* into *H. himera* is indicated in blue. (C) Table with  
 196 parameter ranges obtained from five best scoring models out of twenty runs.  $N_a$  = ancestral population size,  $N_1$  = Size of  
 197 population 1,  $N_2$  = size of population 2,  $g_1$  = growth coefficient of population 1,  $g_2$  = growth coefficient of population 2,  $ls$  =  
 198 linked selection,  $Q$  = proportion of the genome with a reduced effective size due to linked selection ( $ls$ ),  $m_{1<2}$  = migration from  
 199 population 2 into 1,  $m_{2<1}$  = migration from populations 1 into 2,  $t_{split}$  = split time,  $t_{sc}$  = time of secondary contact,  $P$  = proportion  
 200 of the genome evolving neutrally.

201

202 *Simulations of linked selection and secondary contact predict correlation of recombination rate with*  
 203 *divergence, not admixture*

204 The demographic models provide a comprehensive reconstruction of the evolutionary history of  
 205 divergence between *H. erato* and *H. himera* and allow us to estimate time intervals of lineage splits, size  
 206 changes and migration changes that span the past million year of divergence between *H. himera* and  
 207 *erato* in the Andes (Figure 3). We next use these estimates to inform simulations and conduct further

208 tests for the impact of selection and demography during genomic divergence of the incipient species. To  
209 do this, we simulated the expected relationship of recombination rate to relative divergence ( $F_{ST}$ ) and  
210 admixture ( $f_d$ ) at a locus linked to a site under selection. We used two distinct scenarios of migration  
211 broadly applicable to *H. erato* and *H. himera* and compared the simulation results to real data (Figure  
212 4A, B).

213 As demonstrated by other studies, in a scenario of “isolation with migration” (IM) with long periods of  
214 migration and divergent selection, our simulations predict a strong negative correlation between  
215 recombination rate and  $F_{ST}$  [20,21,33] and a strong positive correlation between recombination rate and  
216  $f_d$  [4,8] (Figure 4C, left). This pattern reflects the degree of linkage between neutral sites and loci under  
217 divergent selection [23,34]. In contrast, our simulations show that the relationship between  
218 recombination rate and  $f_d$  is reduced when migration is more recent or low (Figure 4C, left). As expected,  
219 in a “secondary contact” (SC) scenario that is characterized by a more recent onset of migration, the  
220 simulations show that  $F_{ST}$  values are generally high and  $f_d$  values close to zero (Figure 4C, right). This  
221 results in the absence of a relationship between recombination rate and  $F_{ST}$  or  $f_d$  in most SC scenarios.  
222 However, when selection in the genome is recent (~selective sweeps), a negative relationship between  
223 recombination rate and divergence, but not admixture, emerges in the SC scenario (Figure 4C). This  
224 relationship arises due to linked selection that reduces diversity within populations and increases the  
225 relative divergence,  $F_{ST}$ , between populations [35]. The relationship holds for lower selection strengths  
226 at relatively short distances from the selected site ( $s = 0.02$ ; Figure S5).

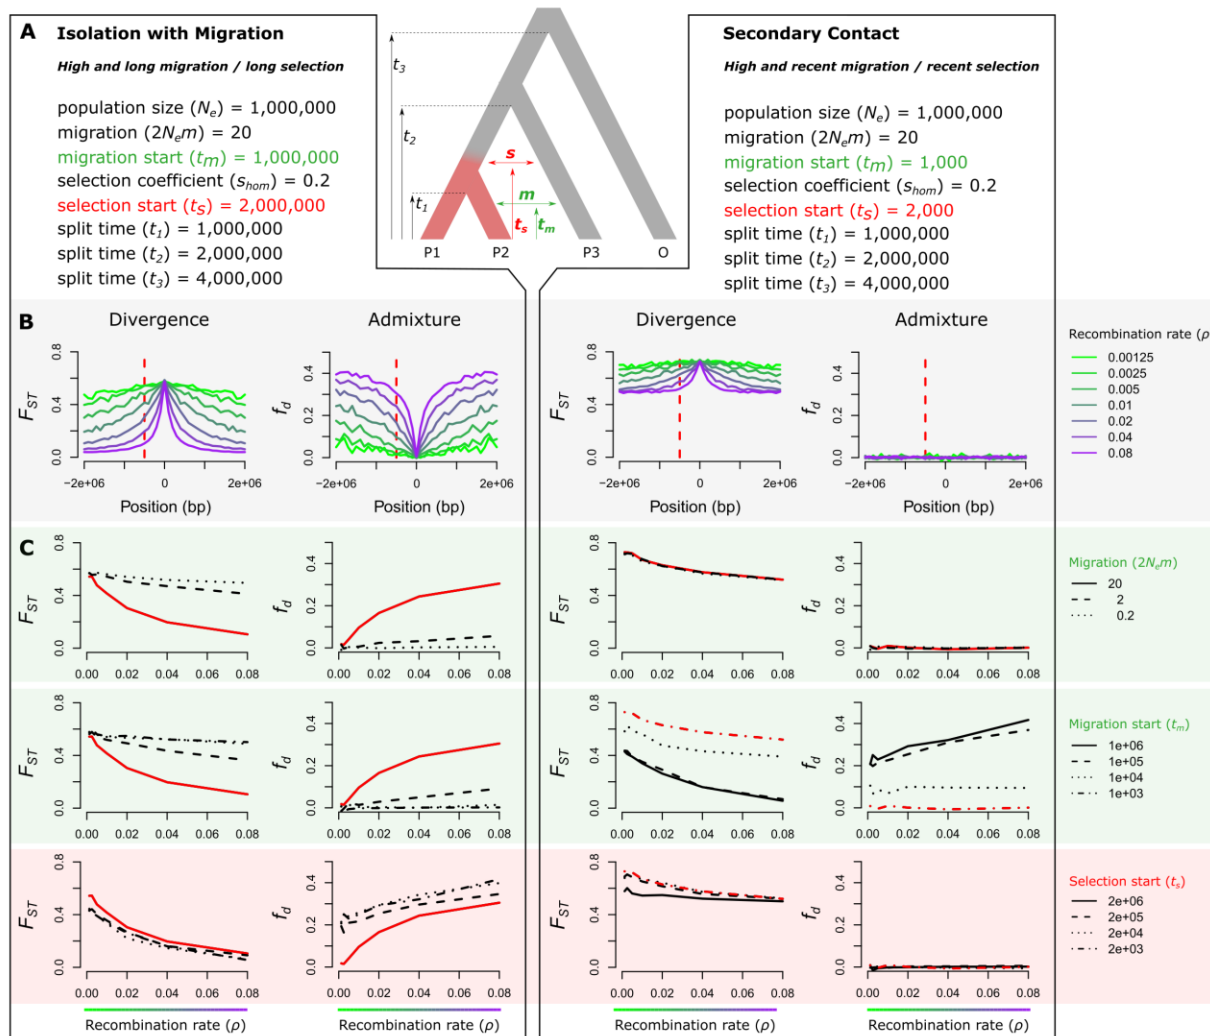

227

228 **Figure 4. Expected relationship of recombination rate with divergence ( $F_{ST}$ ) and admixture ( $f_d$ ) near a divergently selected**  
 229 **locus. (A)** The population tree shows the simulated scenario with the onset of divergent selection on a derived allele indicated  
 230 in red and in which migration rate ( $m$ ) and migration time ( $t_m$ ) between P2 and P3 and selection start time ( $t_s$ ) are varied. Left  
 231 and right of the simulated scenario are parameter combinations for two extreme scenarios that both include linked selection;  
 232 on the left a scenario with Isolation with Migration (IM) and on the right a scenario reflecting Secondary Contact (SC). **(B)** Effect  
 233 of population recombination rate ( $\rho$ ) on relative divergence ( $F_{ST}$ ) and admixture ( $f_d$ ) near a divergently selected locus for the  
 234 two simulated scenarios with parameter combinations as in panel A. The selected allele occurs at position 0. The dashed red  
 235 line indicates a locus at 500 kb from the selected locus at which the relationship between  $\rho$ , divergence and admixture is  
 236 assessed in panel C. **(C)** The effect of migration start time ( $t_m$ ) and selection start time ( $t_s$ ) on the relation between  $\rho$ , divergence  
 237 and admixture. Apart from the respective parameters being evaluated, other parameters were fixed as in panel A, with the red  
 238 lines indicating the exact parameter combinations as in panel A and B. For simulations with a lower selection coefficient ( $s =$   
 239 0.02), see Figure S5.

240

241 *Patterns of divergence are shaped by linked selection*

242 The differences in the expected relationships between recombination rate and  $F_{ST}$  and between  
 243 recombination rate and  $f_d$  under the IM and SC scenarios provide specific predictions that we can use to

244 determine how linked selection may have shaped genomic divergence between *H. erato* and *H. himera*.  
245 We first explored this relationship of recombination rate, relative divergence and admixture across the  
246 *optix* locus using the expected patterns obtained from our simulations. The *optix* locus controls red wing  
247 pattern differences among *H. erato* races, as well as between *H. erato* and *H. himera* and is a target of  
248 strong selection (Figure 5A) [26,31,36]. We found recombination rate ( $\rho$ ) estimates were markedly lower  
249 upstream, compared to downstream of the *optix* gene (Figure 5C). Such sharp decreases in  
250 recombination rate near chromosome ends have been observed in other *Heliconius* species [4] and likely  
251 explain the decrease in recombination rate upstream of the *optix* gene. To test if selection at the *optix*  
252 locus has produced the expected relationship of recombination rate with divergence and admixture, as  
253 predicted above in our simulations (Figure 4C), we sampled sites 500 kb from the center of the peak of  
254 the divergence at *optix* and plotted the recombination rate and divergence estimates for those sites  
255 (Figure 5D). As expected from the scenario of SC with linked selection, we found negative relationships  
256 between recombination rate and divergence ( $F_{ST}$ ) and no correlations between recombination rate and  
257 admixture ( $f_d$ ). These findings demonstrate that our simulated patterns of recombination, divergence  
258 and admixture, reflect real observed patterns in a region known to be under strong selection.

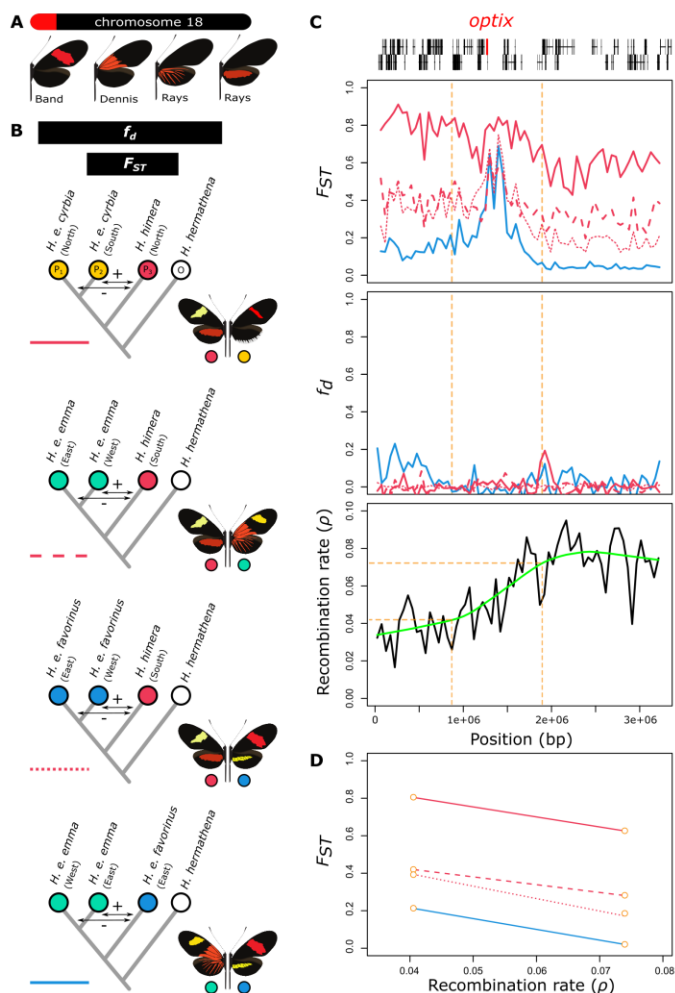

259

260 **Figure 5. Divergence ( $F_{ST}$ ), admixture ( $f_d$ ) and recombination rate ( $\rho$ ) near the red color pattern gene *optix*.** (A) The *optix* gene  
 261 is located near the start of chromosome 18 and has been demonstrated to control the expression of red color pattern elements  
 262 in *Heliconius* wings [37]. (B) Relative divergence ( $F_{ST}$ ) and admixture ( $f_d$ ) comparisons performed between *H. himera*, *H. e.*  
 263 *cyrba*, *H. e. emma* and *H. e. favorinus*. Colored circles match color codes in Figure 2. (C) Lines show  $F_{ST}$ ,  $f_d$  and recombination  
 264 rate ( $\rho$ ) calculated in 50 kb non-overlapping windows. The green line in the bottom plot shows a loess fit of the recombination  
 265 rate. Gene models including the location of the *optix* gene are presented at the top. (D) Relationship between  $F_{ST}$  and  
 266 recombination rate ( $\rho$ ) 500 kb left and right from the center of the *optix* regulatory sequence divergence peak.

267

268 To test for evidence that linked selection has driven genome-wide patterns of divergence, we  
 269 compared recombination rates with divergence and admixture across the whole genome. We found a  
 270 significant negative association between recombination rate ( $\rho$ ) and relative divergence ( $F_{ST}$ ) between *H.*  
 271 *himera* and *H. erato* populations (Figure 6A) but no association with admixture ( $f_d$ ) (Figure 6B). These  
 272 genome-wide patterns are identical to those observed at the *optix* locus (Figure 5D) and the simulations  
 273 of SC with linked selection (Figure 4C). Further, we observed a positive association between proportion  
 274 of coding sequence and relative divergence, which again suggests the importance of linked selection for

275 genome divergence (Figure S6). Additionally, we found a significant relationship between  $F_{ST}$  and  $f_d$  in  
 276 the *H. himera* – *H. erato* hybrid zones, which suggests that, although admixture can partly explain  
 277 reduced  $F_{ST}$  (Figure 6C), the rates of migration have been too low or recent to build up a significant  
 278 association with recombination rate. Finally, we note that the observed patterns of linked selection may  
 279 include the effects of both genetic hitchhiking and background selection. While our genomic dataset  
 280 does not allow us to differentiate between them, our simulations suggest that the observed patterns  
 281 can be explained by genetic hitchhiking alone and other studies suggest background selection may be  
 282 too subtle to cause these patterns [9].

283

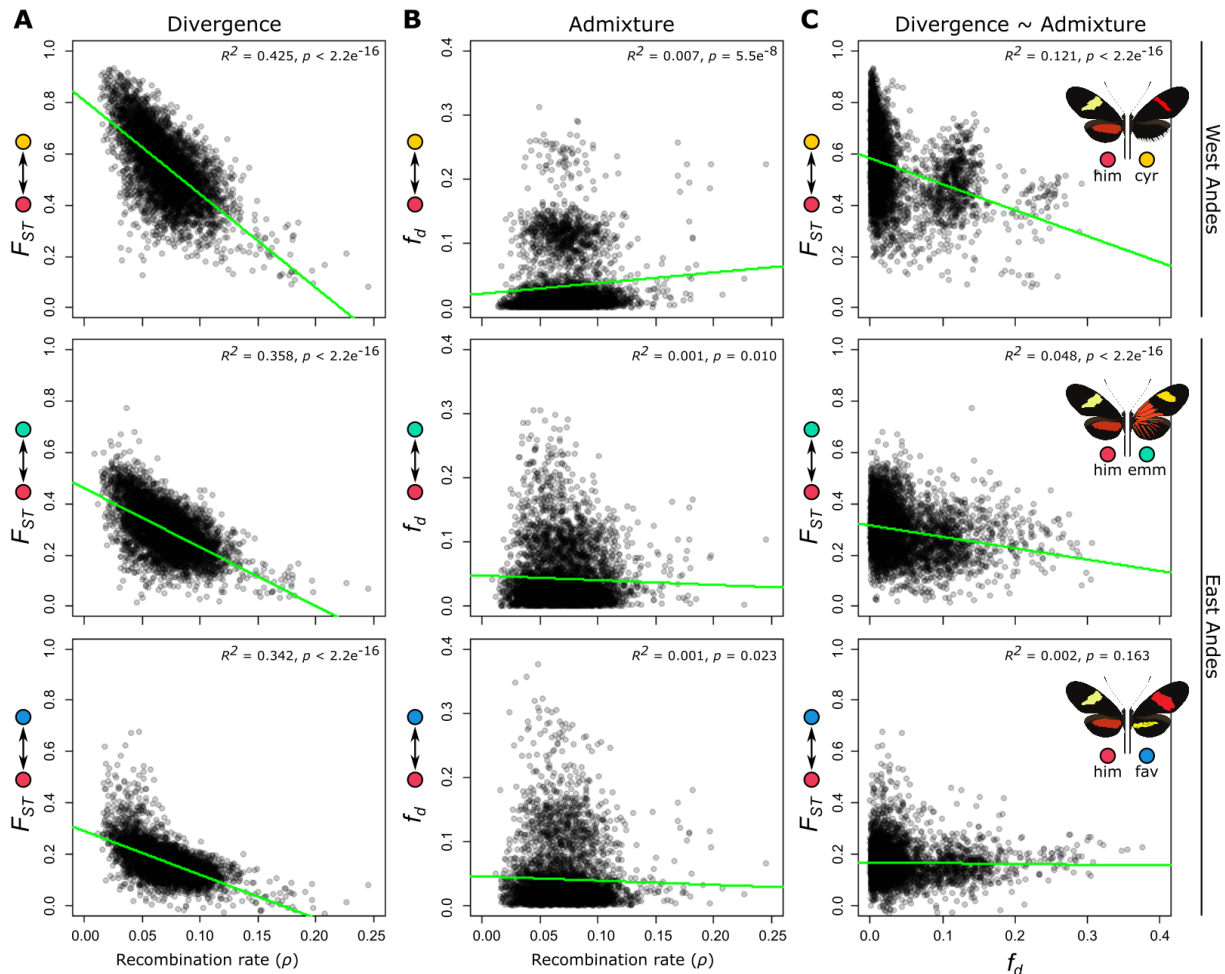

284

285 **Figure 6. Correlations of divergence and admixture proportions with recombination rate in the three *H. himera* – *H. erato***  
 286 **contact zones. (A)** Relative divergence ( $F_{ST}$ ) versus recombination rate ( $\rho$ ). **(B)** Admixture proportion ( $f_d$ ) versus recombination  
 287 rate (cM/Mb). **(C)** Relative divergence ( $F_{ST}$ ) versus admixture proportion ( $f_d$ ). Statistics were calculated in 50 kb non-overlapping  
 288 windows. Recombination rates were calculated from each *H. erato* population separately and averaged over populations (see  
 289 methods) and showed a genome-wide average of  $\rho$  equal to 0.071 (SD = 0.026;  $\rho = 4N_e r$ ). Colored circles match geographic  
 290 distributions and contact zones in Figure 2.



291 *Asymmetrical admixture suggests a polygenic species boundary*

292           The combination of empirical and simulation data suggests that periods of isolation and linked  
293 selection within populations have played a major role in shaping the divergence landscape between *H.*  
294 *erato* and *H. himera*. To explore how these factors influence the finer details of genomic divergence we  
295 investigated patterns of admixture along chromosomes. We were both interested in the patterns of  
296 admixture across our three replicate hybrid zones and inferring the direction of admixture. To  
297 determine if patterns of admixture were similar across the three contact zones, we used a modified  
298 four-taxon  $D$ -statistic called  $f_d$  [38]. Across several chromosomes we observed large blocks of increased  
299  $f_d$ , particularly in the hybrid zone between *H. himera* and *H. e. cyrbia* west of the Andes (see  
300 chromosomes 3, 4, 6, 7, 8, 12 and 18 in Figure 7A). The large size of these admixture tracks indicates  
301 that these signals are recent and there has not been sufficient time for recombination to break down  
302 the haplotypes. In contrast, high admixture values ( $f_d$ ) between *H. himera* and *H. e. emma* and *H. himera*  
303 and *H. e. favorinus* east of the Andes are distributed more evenly along the chromosomes (Figure 7A),  
304 which would agree with older admixture events between these populations. In general, there was a lack  
305 of overlap between genomic regions with high  $f_d$  in the different hybrid zone comparisons further  
306 reinforcing the idea that we are examining independent admixture events.

307           To determine the directionality of introgression across the genome we used a five-taxon  $D_{FOIL}$ -  
308 statistic [39]. This test considers all available taxa (i.e. two populations of *H. himera* and two populations  
309 of *H. erato*) and calculates all possible four-taxon  $D$ -statistic comparisons to infer admixture as well as  
310 directionality of admixture. While the  $D_{FOIL}$ -statistic is calculated using a single genome for each taxon,  
311 we performed this test on all possible combinations of available samples and represented the  $D_{FOIL}$  signal  
312 as the proportion of significant comparisons (Figure 7A). Comparing  $f_d$  and  $D_{FOIL}$  results revealed that  
313 among loci that show strong evidence of admixture, there is a relative paucity of loci in *H. himera*  
314 individuals carrying *H. erato* alleles (Figure 7B). This asymmetry suggests *H. erato* is more porous to  
315 introgressed alleles from *H. himera* than vice-versa. Consistent with a well characterized “large X(Z)  
316 effect” in speciation, on the sex (Z) chromosome there are only a few loci that show signals of admixture  
317 (high  $f_d$ ) and again the  $D_{FOIL}$  tests only show evidence of introgression of *H. himera* alleles into *H. erato*  
318 (Figure 7A).



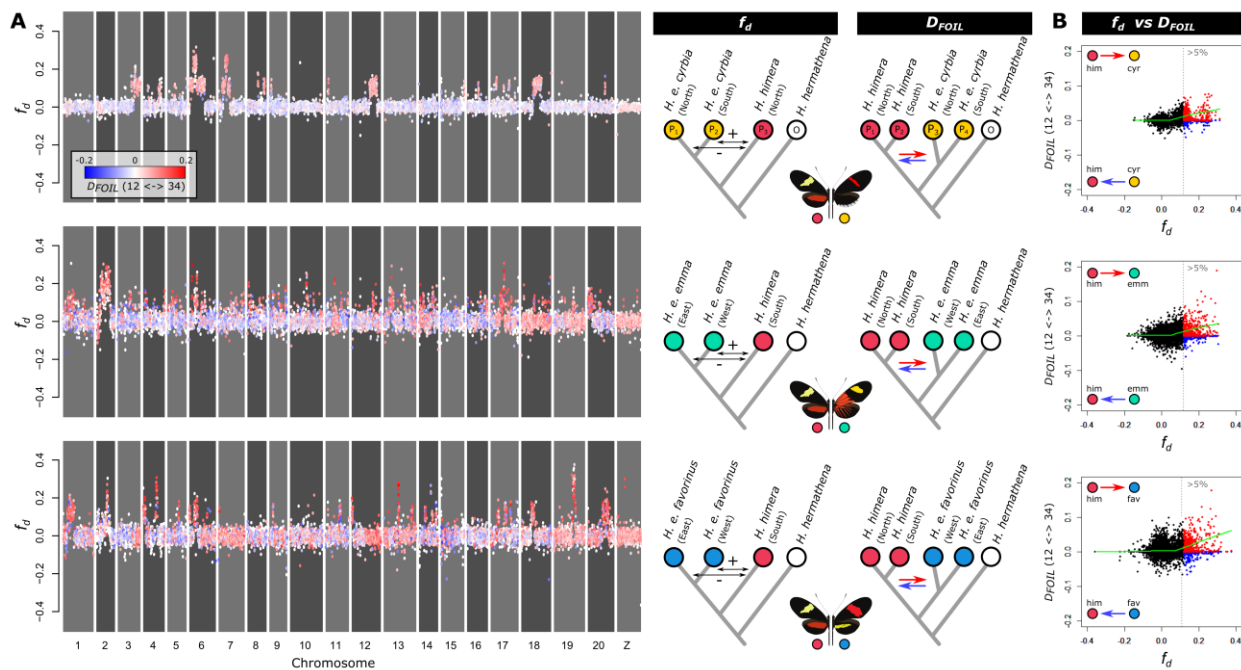

319

320 **Figure 7. Admixture ( $f_d$ ) and admixture directionality ( $D_{FOIL}$ ) between *H. himera* and *H. erato* in three contact zones. (A)** Points  
 321 show admixture ( $f_d$ ) values, whereas coloring shows directionality ( $D_{FOIL}$ ) in 50 kb non-overlapping windows for the contact  
 322 zones *H. himera* – *H. e. cyrba* (top), *H. himera* – *H. e. emma* (middle) and *H. himera* – *H. e. favorinus* (bottom). Blue indicates  
 323 predominant admixture from *H. erato* into *H. himera* (12 <- 34), whereas red indicates predominant admixture from *H. himera*  
 324 into *H. erato* (12 -> 34) based on the  $D_{FOIL}$  tests. (B) Summary of admixture versus directionality with points above the 95%  
 325 quantile indicated in blue (12 <- 34) and red (12 -> 34) demonstrates that the majority of windows with high  $f_d$  indicate  
 326 admixture from *H. himera* into *H. erato*. The green line indicates a loess fit of the data. Colored circles match color codes in  
 327 Figure 2.

328

329 We propose that the multitude of loci with asymmetrical gene flow may represent the genetic signal of  
 330 a polygenic species barrier. These barriers could result from co-adapted loci in *H. himera* that cannot be  
 331 replaced by *H. erato* alleles without fitness consequences. The inference that this pattern results from a  
 332 polygenic species barrier is further strengthened by two observations. First, *H. himera* males have been  
 333 shown to mate more frequently with F1 hybrids compared to *H. erato* males [25], which should result in  
 334 an opposite asymmetric admixture pattern than we found [40], with more alleles introgressing from *H.*  
 335 *erato* into *H. himera*. Second, the smaller effective population size estimates of *H. himera* should also  
 336 result in an opposite pattern of asymmetric admixture [13], with more alleles introgressing from *H.*  
 337 *erato* into *H. himera*. This latter expectation is observed in the demographic modeling results, which  
 338 show greater migration of alleles from *H. erato* into *H. himera* and corresponds to their estimated  
 339 differences in population size between the species (Figure 3B), but is not seen in the more recent signals  
 340 of admixture as measured by  $f_d$ .

341 *Different histories can generate similar heterogeneous divergence patterns*

342           Although the genomic landscape of divergence between hybridizing taxa reflects the history of  
343 selection and demographic changes they have experienced, different histories can generate strikingly  
344 similar heterogeneous patterns. This can greatly limit our ability to make inferences about the  
345 evolutionary processes driving genomic change [2]. For example, in *Heliconius melpomene* there are  
346 strikingly similar heterogeneous landscapes of divergence to those we report here for *H. erato* and *H.*  
347 *himera*, despite known differences in their evolutionary histories [41,42]. Here, we show that through a  
348 comprehensive set of analytical approaches we can disentangle these evolutionary histories and reveal  
349 that different evolutionary processes have resulted in similar divergence landscapes among the *H. erato*  
350 and *H. melpomene* clades.

351           *Heliconius melpomene* and *H. erato* are co-mimics and experience similar strong selective  
352 pressures on wing color patterns throughout their distributions. In the *H. melpomene* clade, *H.*  
353 *melpomene* comes into contact and hybridizes with *H. cydno* in Panama and occasionally with *H.*  
354 *timareta* in Ecuador and northern Peru. Although at first sight the genomic landscapes appear similar,  
355 correlation analyses reveal differences in the relative importance of admixture. The *H. melpomene*  
356 comparisons showed strong correlations of recombination rate with divergence as well as admixture,  
357 which supports a longer history of divergent selection with gene flow (Martin et al. 2019). In contrast, *H.*  
358 *himera* and *H. erato* comparisons showed recombination rate correlated with divergence, but not  
359 admixture. We suggest the lack of correlation may be because the secondary contact is recent and the  
360 rates of gene flow are low between *H. erato* and *H. himera*. Thus, there has not been enough time for a  
361 correlation between recombination rate and admixture to arise. Instead, we argue that differences  
362 accumulated in periods of isolation have had more profound effects on the divergence landscape of *H.*  
363 *erato* and *H. himera* whereas gene flow has likely been more continuous throughout the divergence  
364 history of the young species pair in the *H. melpomene* clade. These differences in the history of  
365 divergence among co-mimetic species highlights the power of approaches like those applied here to  
366 resolve the roles of different evolutionary processes in generating seemingly similar heterogeneous  
367 patterns of genomic divergence.

368

369

370 *Conclusions*

371           We observed genome-wide increase of divergence as reproductive barriers increase between  
372 hybridizing populations or species. Nonetheless, it remains difficult to determine if peaks of divergence  
373 result from barrier loci that are resistant to ongoing gene flow (heterogeneous gene flow), from recent  
374 selective sweeps in isolated populations (heterogeneous selection), or both. Fortunately, using a  
375 combination of demographic modeling, simulations, and correlation analyses we can characterize the  
376 evolutionary processes responsible for the heterogeneous landscapes of divergence. For the incipient  
377 species *H. erato* and *H. himera*, our results suggest a disproportionately large effect of the Z  
378 chromosome on the evolution of species barriers in *H. erato*. The data also favor a scenario of periods of  
379 isolation accompanied by both selection and gene flow. The overall patterns of asymmetric admixture  
380 suggest that during periods of isolation, selection at multiple loci may have resulted in a polygenic  
381 species boundary. This finding adds to a number of studies that illustrate how fluctuating gene flow and  
382 pervasive selection along the genome lead to the evolution of polygenic architectures of species  
383 boundaries [4,8,21,43,44].

## 384 **Methods**

### 385 *Sampling*

386 We obtained whole genome resequence data for a total of 122 *Heliconius* butterflies (Tables S4).  
387 These include northern (North Ecuador, n = 10) and southern (South Ecuador *H. himera* contact zone, n  
388 = 4) *H. e. cyrbia*, western (Peru *H. himera* contact zone, n = 4) and eastern (Peru *H. e. favorinus* contact  
389 zone, n = 7) *H. e. emma* and western (Peru *H. himera* contact zone, n = 4) and eastern (Peru *H. e. emma*  
390 contact zone, n = 8) *H. e. favorinus* used to study admixture patterns with northern (Ecuador *H. e.*  
391 *emma/favorinus* contact zone, n = 5) and southern *H. himera* (Peru *H. e. cyrbia* contact zone, n = 4).  
392 Additionally, samples from *H. e. petiverana* (Mexico, n = 5), *H. e. demophoon* (Panama, n = 10), *H. e.*  
393 *hy dara* (Panama, n = 6 and French Guiana, n = 5), *H. e. erato* (French Guiana, n = 6), *H. e. amalfreda*  
394 (Suriname, n = 5), *H. e. notabilis* (Ecuador *Heliconius erato lativitta* contact zone, n = 5 and Ecuador *H. e.*  
395 *etylus* contact zone, n = 5), *H. e. etylus* (Ecuador, n = 5), *H. e. lativitta* (Ecuador, n = 5), *H. e. phyllis*  
396 (Bolivia, n = 4), *H. e. venus* (Colombia, n = 5) and *H. e. chestertonii* (Colombia, n = 7) were used for  
397 contact zone divergence analysis and population structure visualization as well as samples of *H.*  
398 *hermathena* (Brazil, n = 3) as an outgroup to root the phylogenetic inference and polarize site frequency  
399 spectra. All data have been previously published [26,28], apart from the ten *H. e. cyrbia* from North  
400 Ecuador.

401

### 402 *Sequencing and genotyping*

403 Genotypes were obtained as in [28]. In short, whole-genome 100-bp paired-end Illumina  
404 resequencing data from *H. erato* samples were aligned to the v1 [26] reference genome, using BWA v0.7  
405 [45]. PCR duplicated reads were removed using PICARD v1.138 (<http://picard.sourceforge.net>) and  
406 sorted using SAMTOOLS [46]. Genotypes were called using the genome analysis tool kit (GATK)  
407 Haplotypecaller [47]. Individual genomic VCF records (gVCF) were jointly genotyped using GATK's  
408 genotype GVCFs. Genotype calls were only considered in downstream analysis if they had a minimum  
409 depth (DP)  $\geq 10$ , maximum depth (DP)  $\leq 100$  (to avoid false SNPs due to mapping in repetitive regions),  
410 and for variant calls, a minimum genotype quality (GQ)  $\geq 30$ . Specific data filtering steps for running  
411 population structure, phylogenetic and demographic analysis are explained in the respective sections.

412 *Population structure and phylogenetic relationships*

413 We estimated levels of relative divergence ( $F_{ST}$ ) [48] between populations in nonoverlapping 50  
414 kb windows using python scripts and egglib [49]. For this analysis, we only considered windows for  
415 which at least 10% of the positions were genotyped for at least 75% of the individuals within each  
416 population. On average 96% of windows met this criterium. To discern population structure among the  
417 *H. erato* and individuals, we performed principal component analysis (PCA) using EIGENSTRAT SmartPCA  
418 [50]. For this analysis, we only considered autosomal biallelic sites that had coverage in all individuals  
419 and excluding the Z chromosome (5,058,785 SNPs). Using the same filtering but including the outgroup  
420 *H. hermathena* (4,927,152 SNPs), we used FastTree v2.1 [51] to infer an approximate maximum  
421 likelihood phylogeny using the default parameters.

422

423 *Demographic modeling*

424 We performed demographic analyses on the joint site-frequency spectra (JSFS) of five  
425 population comparisons using a modified version of *dad*i v1.7 [11]. Genotype calls were filtered for  
426 biallelic autosomal SNPs with a threshold of at least 50 % minimum genotype calls for each population  
427 of interest. In order to ensure demographic analyses were performed on unlinked loci, we subsampled  
428 our data so that a single SNP was selected at least every ~1000 bp (based on linkage disequilibrium maps  
429 from [52] in Figure S1). Unfolded joint site-frequency spectra (JSFS) were created from the filtered calls  
430 data using *H. hermathena* as an outgroup, including on average 316090.3 SNPS (Table S3). The  
431 proportion of accurate SNP orientation (O) was consistent across all pairwise comparisons (~97 %),  
432 which suggests that ancestral state identification was correct for the majority of SNPs using *H.*  
433 *hermathena* as an outgroup.

434 Models tested include four basic scenarios in addition to 22 extensions of the basic models that  
435 allowed for independent assessment of additional selective and demographic parameters [32] (Table  
436 S5). Basic model scenarios included strict isolation (SI), ancient migration (AM), isolation-with-migration  
437 (IM), and secondary contact (SC). The standard four models involved the divergence of an ancestral  
438 population ( $N_{ref}$ ) at  $t$  generations into two resulting daughter populations with an effective size of  $N_1$  and  
439  $N_2$ , respectively. Migration occurred in IM, AM, and SC at rate  $m_{12}$  from population 2 into population 1  
440 and  $m_{21}$  in the opposite direction. Model extensions included growth rate parameters ( $g$ ) which account  
441 for changes in the effective population size over time (bottlenecks and expansions) by taking a ratio of  
442 the contemporary and ancient population sizes. Note that *dad*i cannot infer both heterogeneous

443 migration and genetic drift when gene flow is not temporally localized (i.e. IM model). To capture the  
444 effects of linked selection that are due to sweeps and background selection (Hill and Robertson, 1966;  
445 Maynard Smith and Haigh, 1974; Charlesworth et al, 1993), further model extensions incorporated two  
446 categories of loci ( $2N$ ) that occur in proportions of  $Q$  and  $1-Q$  in order to account for heterogeneity in  $N_e$   
447 across the genome. A Hill-Robertson scaling factor (*hrf*) was included with these models that relates the  
448 effective size of loci experiencing selection to that of neutral loci. Models that infer migration (IM, AM,  
449 SC) were extended to include parameters that capture heterogeneous migration rates ( $2m$ ) across the  
450 genome resulting from selection on barrier loci during adaptive divergence [16]. These extensions  
451 allowed for the estimation of a proportion of loci ( $P$ ) experiencing standard migration rates ( $m_{12}$  and  $m_{21}$ )  
452 and a second category of loci ( $1-P$ ) undergoing rates  $me_{12}$  and  $me_{21}$ . Given that the JSFS was polarized  
453 using *H. hermathena* as the outgroup for all comparisons, a SNP orientation parameter ( $O$ ) was included  
454 in all models to account for ancestral state misidentification. Additionally, the effective mutation rate ( $\vartheta$ )  
455 of  $N_{ref}$  was estimated as a free parameter in all comparisons.

456 To check for model convergence, a total of 20 independent optimizations were performed for  
457 each model on each population comparison. When running these models, consistency in the likelihood  
458 scores generally increased as the best optimized parameters from previous steps were incorporated into  
459 subsequent steps. To score the models and account for overparameterization, the Akaike Information  
460 Criterion (AIC: Burnham and Anderson 2004) was used and parameters from the top five scoring runs for  
461 each model were averaged. The models with the best average AIC score for each comparison were  
462 retained for each comparison. The highest and lowest optimized parameter values in the top five  
463 replicate runs for each model were used to construct intervals to estimate uncertainty.

464 Model parameter estimates for effective population sizes, migration rates and divergence times  
465 were transformed into absolute units using a *Heliconius* mutation rate of  $2 \times 10^{-9}$  per generation (i.e.  
466 spontaneous *Heliconius* mutation rate corrected for selective constraint; Keightley et al. 2014; Martin,  
467 Eriksson, et al. 2015) and assuming a generation time of 0.25 years. Ancestral effective population size  
468 was calculated using the optimized theta value for each model comparison ( $N_{ref} = \vartheta/4\mu L$ ), where  $L$   
469 represents the effective sequence length and  $\mu$  the estimate of the mutation rate. Effective sequence  
470 length for each pairwise comparison is estimated as  $L = (x/y)z$ , where  $x$  is the number of SNPs used in the  
471  $\partial\text{adi}$  demographic analysis and  $y$  is the number of segregating sites detected in the original sample out  
472 of  $z$  total sites. Migration rates are presented in units of  $2N_{ref}$  to represent the number of individuals per  
473 generation that migrate into each population.

#### 474 *Divergence and admixture simulations*

475 To compare patterns in our data to expectations, we simulated genealogies near a selected  
476 locus. Genealogies were simulated using the coalescent simulator *msms* [56] and from these  
477 genealogies 10 kb sequences were simulated with a mutation rate of  $2e^{-9}$  (i.e. spontaneous *Heliconius*  
478 mutation rate corrected for selective constraint; Keightley et al. 2014; Martin, Eriksson, et al. 2015) and  
479 a Hasegawa–Kishino–Yano (HKY) substitution model using *seq-gen* v1.3.4 [57]. With *msms*, we simulated  
480 four populations with a split history given by ((P1, P2), P3), O where  $t_1$ ,  $t_2$  and  $t_3$  denote the split times  
481 between P1 and P2, (P1, P2) and P3 and ((P1, P2), P3) and O, respectively (Figure 4A). Population size  
482 ( $N_e$ ) was fixed to 1,000,000 individuals and  $t_2$  and  $t_3$  were fixed to 0.5 (2,000,000 generations) and 1  
483 (4,000,000 generations) coalescent units ( $4N_e$ ), respectively. Within the range of selection on color  
484 pattern in *Heliconius* [58], we simulated divergent selection at a single locus with selection coefficients  
485 ( $s$ ) of 0.2 and 0.02 for homozygous genotypes and 0.1 and 0.01 for heterozygous genotypes and  
486 selection strength specified in units of  $2N_e s$ . Selection was set to work in opposite direction for P1 and  
487 P2 versus P3 and O and was set to start at time  $t_s$ . After population splits, migration ( $m$ ) was restricted  
488 between P2 and P3 only, with symmetrical migration rates and a start time equal to  $t_m$ . In relevance to  
489 our demographic modeling results, we ran simulations by varying the parameters  $t_s$  (selection start time;  
490  $2e^3$  -  $2e^6$  generations),  $t_m$  (migration start time;  $2.5e^{-5}$  -  $5e^{-1}$  generations),  $m$  (migration rate;  $1e^{-7}$  -  $1e^{-5}$   
491 generations) and  $\rho$  (population recombination rate  $4N_e r$ ;  $r$  = probability of recombination per generation  
492 per bp;  $6.25e^{-4}$  -  $8e^{-2}$ ). A maximum  $\rho$  of  $8e^{-2}$  was used for computational feasibility. The genealogies were  
493 sampled at 100 kb increments from the selected locus. This was achieved by using an infinite  
494 recombination sites model and changing the position of the selected locus in increments of 10 neutral  
495 locus units (i.e. 10 x 10 kb) away from the sampled locus. Divergence ( $F_{ST}$ ) was calculated as in Hudson *et*  
496 *al.* 1992 and admixture ( $f_d$ ) was calculated as in Martin *et al.* 2016 using python scripts and *egglib* v3 (De  
497 Mita & Siol, 2012). We investigated the correlation between  $F_{ST}$ ,  $f_d$  and recombination rate at a distance  
498 of 500 kb from a selected locus but similar expectations are obtained from wide range of distances to  
499 the selected locus. Simulations were run with 100 replicates for each parameter combination.  
500 Pseudocode to run the *msms* command lines are provided in Tables S6.

501

#### 502 *Recombination rate estimates*

503 We estimated fine-scale variation in population recombination rate ( $\rho = 4N_e r$ ;  $r$  = probability of  
504 recombination per generation per bp) along the *H. erato* chromosomes from linkage-disequilibrium in



505 population genetic data using *LDhelmet* v1.7 [59]. We phased quality filtered genotypes from thirteen *H.*  
506 *erato* populations (i.e. *H. e. cyrba*, *H. e. venus*, *H. e. demophoon*, *H. e. hydara* (Panama), *H. e. emma*, *H.*  
507 *e. etylus*, *H. e. lativitta*, *H. e. notabilis*, *H. e. favorinus*, *H. e. phyllis*, *H. e. erato*, *H. e. hydara* (French  
508 Guiana) and *H. e. amalfreda*) using Beagle v4.1 [60] with default parameters. From the phased  
509 genotypes, fasta sequences were generated for 50 kb windows. These 50 kb windows were transformed  
510 to haplotype configuration files with the recommended window size of 50 SNPs used by *LDhelmet* to  
511 estimate composite likelihoods of the recombination rate. From the haplotype configuration files,  
512 lookup tables for two-locus pairwise recombination likelihoods and Padé coefficients were generated  
513 within the recommended value range. Transition matrices were calculated for each chromosome  
514 separately by comparing genotypes obtained from *H. erato demophoon* to the outgroup species *H.*  
515 *hermathena*. The likelihood lookup tables, Padé coefficients and transition matrices were used in the  
516 rjMCMC procedure of *LDhelmet* to estimate the recombination map. In this latter step, 1000,000  
517 Markov chain iterations were run with a burn-in of 100,000 iterations, a window size of 50 SNPs and  
518 block penalty of 50. To reduce the potential effect of locus-specific changes in effective population size  
519 ( $N_e$ ) on population recombination rate ( $\rho$ ) estimates (e.g. due to population specific selective sweeps or  
520 background selection), we estimated  $\rho$  for each *H. erato* population separately and obtained averages  
521 for each 50 kb interval.

522

### 523 *Admixture statistics*

524 We estimated admixture proportions for 50 kb non-overlapping windows using the  $f_d$  statistic  
525 [38]. This statistic is based on the ABBA-BABA test or Patterson's  $D$  statistic which measures an excess of  
526 derived allele sharing between sympatric non-sister taxa [61]. This excess is tested by comparing the  
527 relative abundance of SNP patterns termed ABBAs and BABAs in a tree of three populations and an  
528 outgroup with the relationship (((P1, P2), P3), O). ABBAs are sites where a derived allele is shared  
529 between P2 and P3, whereas BABAs are sites where a derived allele is shared between P1 and P3. Under  
530 a neutral coalescent model, such sites are only expected to be found due to incomplete lineage sorting  
531 or recurrent mutation and a  $D$  statistic of 0 is expected. In the presence of admixture, however, an  
532 excess of either ABBAs or BABAs can be observed and a  $D$  statistic that significantly deviates from 0 may  
533 be obtained. The  $f_d$  statistic is derived from the  $D$  statistic by calculating the difference between ABBA  
534 and BABA sites and normalizing this difference by a scenario of complete admixture. The estimator is  
535 dynamic in that for the complete admixture scenario used to normalize, a donor population for the

536 admixture is chosen with the highest frequency of the derived site. The resulting normalized measure is  
537 approximately proportional to the effective migration rate and has been evaluated not to be  
538 confounded by locus-specific changes in effective population size due to background selection or  
539 reductions in diversity due to selective sweeps [4,38]. The populations included as P1, P2, P3 and O are  
540 indicated in the figures. *Heliconius hermathena* samples were consistently used as the outgroup taxa.

541

#### 542 *Admixture directionality*

543 By expanding the four-taxon  $D$  statistic to a five-taxon scenario, it is possible to obtain  
544 information on the directionality of admixture (i.e. donor versus recipient population). A set of statistical  
545 measures that use a five-taxon symmetric phylogeny to infer both the taxa involved in and the direction  
546 of admixture are called the  $D_{FOIL}$  statistics [39]. The  $D_{FOIL}$  statistics identify taxa involved in admixture by  
547 performing four possible  $D$  tests with different combinations of three ingroup taxa within a five-taxon  
548 phylogeny defined as (((P1, P2), (P3, P4)), O). These four  $D$  tests considered collectively can provide  
549 information on the directionality of admixture. This is because admixture does not only change the  
550 position of the donor sample in the topology but will also change the relationship of the donor's sister  
551 taxon to the other taxa in the phylogeny. For instance, if admixture occurs from P2 into P3, the sampled  
552 topology becomes (((P2, P3), P1), P4), O) and P1 will group more closely to (P2, P3) because of more  
553 recent sharing of variation with P2, whereas if admixture occurs from P3 into P2, the topology becomes  
554 (((P2, P3), P4), P1), O). For the latter instance, this will be reflected by a similar sign of the  $D$  test  
555 statistics that include (((P1, P2), P3), O) or (((P1, P2), P4), O) but a different sign for the  $D$  test that  
556 includes (((P3, P4), P2), O) and no significant  $D$  test for (((P3, P4), P1), O). Hence, by comparing the  
557 combinations of different signs (+, -, or 0) of the four  $D$  tests within the five-taxon topology, the  
558 directionality of admixture can be assessed [39].

559 We assessed directionality of admixture in 50 kb non-overlapping windows in the three *H.*  
560 *himera* contact zones with *H. erato* populations using the  $D_{FOIL}$  tests explained above using the available  
561 *dfoil* software ([www.github.com/jbpease/dfoil](http://www.github.com/jbpease/dfoil)). Samples from the *H. himera* North and South  
562 populations were specified as the P1 and P2 group, whereas samples from the considered *H. erato*  
563 populations were specified as P3 and P4. *Heliconius hermathena* was used as the outgroup taxon (ID  
564 hermathena\_13 in Table S4). The  $D_{FOIL}$  statistics were calculated between each possible combination of  
565 available ingroup taxa (i.e. one sample for each taxon group); 800 combinations for *H. himera* – *H. e.*  
566 *cyrba*, 500 for *H. himera* – *H. e. emma* and 480 for *H. himera* – *H. e. favorinus*. Among these sample

567 combinations, significant  $D_{FOIL}$  signatures ( $\chi^2$  goodness-of-fit test) were counted and used to obtain  
568 heterogeneous patterns of admixture directionality along the genome.

569

#### 570 **Data accessibility**

571 For GenBank accession numbers of whole genome resequence data see Table S4.

572

#### 573 **Author contributions**

574 The study was conceived and designed by SVB and BAC in collaboration with RP and WOM.  
575 Genomic analyses were performed by SVB and JC. Demographic modeling with *dadl* was conducted by  
576 JC. Samples of *H. e. cyrbia* from northern Ecuador were contributed by GMK, and CB assisted with  
577 permits. RP, GMK and WOM provided input on results and manuscript preparation. The manuscript was  
578 written and figures were made by SVB, JC, and BAC.

579

#### 580 **Acknowledgments**

581 This work was funded by NSF grant (DEB 1257689) to BAC and RP and NSF EPSCoR RII Track-2  
582 FEC (OIA 1736026) to RP and BAC. For sequencing and computational resources, we thank the University  
583 of Puerto Rico, the Puerto Rico INBRE Grant P20 GM103475 from the National Institute for General  
584 Medical Sciences (NIGMS), a component of the National Institutes of Health (NIH); and awards 1010094  
585 and 1002410 from the EPSCoR program of the NSF. We thank the Ecuadorian Ministerio del Ambiente  
586 (No. 005-13 ICFAU- DNB/MA), Peruvian Ministerio de Agricultura and Instituto Nacional de Recursos  
587 Naturales (201-2013-MINAGRI-DGFFS/DGEFFSS) and Autoridad Nacional De Licencias Ambientales-ANLA  
588 in Colombia (Permiso Marco 0530) for permission to collect butterflies. We thank Simon Martin for  
589 sharing his code and useful discussions that shaped this paper. We thank Nicola Nadeau for access to  
590 sequence data for northern *H. erato cyrbia* samples, which was funded by her UK Natural Environment  
591 Research Council (NERC) fellowship (NE/K008498/1).

592

#### 593 **References**

- 594 1. Wolf JBW, Ellegren H. Making sense of genomic islands of differentiation in light of speciation. *Nat Rev Genet.* Nature  
595 Publishing Group; 2017;18: 87–100.
- 596 2. Ravinet M, Faria R, Butlin RK, Galindo J, Bierne N, Rafajlovic M, et al. Interpreting the genomic landscape of speciation:  
597 a road map for finding barriers to gene flow. *J Evol Biol.* 2017;30: 1450–1477.
- 598 3. Wu C. The genic view of the process of speciation. *J Evol Biol.* 2001;14: 851–865.
- 599 4. Martin SH, Davey JW, Salazar C, Jiggins CD. Recombination rate variation shapes barriers to introgression across  
600 butterfly genomes. *PLOS Biol.* 2019;17: e2006288.
- 601 5. Edelman NB, Frandsen PB, Miyagi M, Clavijo B, Davey J, Dikow R, et al. Genomic architecture and introgression shape a  
602 butterfly radiation. *Science.* 2019;366: 24174–24183.
- 603 6. Tavares H, Whibley A, Field DL, Bradley D, Couchman M, Copsey L, et al. Selection and gene flow shape genomic islands

- 604 that control floral guides. *Proc Natl Acad Sci U S A*. 2018;115: 11006–11011.
- 605 7. Charlesworth B. Effective population size and patterns of molecular evolution and variation. *Nat Rev Genet*. 2009;10:  
606 195–205.
- 607 8. Aeschbacher S, Selby JP, Willis JH, Coop G. Population-genomic inference of the strength and timing of selection  
608 against gene flow. *Proc Natl Acad Sci*. 2017;114: 7061–7066.
- 609 9. Stankowski S, Chase MA, Fuiten AM, Rodrigues MF, Ralph PL, Streisfeld MA. Widespread selection and gene flow shape  
610 the genomic landscape during a radiation of monkeyflowers. *PLoS Biol*. 2019;17: e3000391.
- 611 10. Burri R. Interpreting differentiation landscapes in the light of long-term linked selection. *Evol Lett*. 2017;1: 118–131.
- 612 11. Gutenkunst RN, Hernandez RD, Williamson SH, Bustamante CD. Inferring the joint demographic history of multiple  
613 populations from multidimensional SNP frequency data. *PLoS Genet*. 2009;5: e1000695.
- 614 12. Lohse K, Chmelik M, Martin SH, Barton NH. Efficient strategies for calculating blockwise likelihoods under the  
615 coalescent. *Genetics*. 2016;202: 775–786.
- 616 13. Frantz LAF, Madsen O, Megens HJ, Groenen MAM, Lohse K. Testing models of speciation from genome sequences:  
617 Divergence and asymmetric admixture in Island South-East Asian *Sus* species during the Plio-Pleistocene climatic  
618 fluctuations. *Mol Ecol*. 2014;23: 5566–5574.
- 619 14. Roux C, Tsagkogeorga G, Bierne N, Galtier N. Crossing the species barrier: Genomic hotspots of introgression between  
620 two highly divergent *Ciona intestinalis* species. *Mol Biol Evol*. 2013;30: 1574–1587.
- 621 15. Sousa VC, Carneiro M, Ferrand N, Hey J. Identifying loci under selection against gene flow in isolation-with-migration  
622 models. *Genetics*. 2013;194: 211–233.
- 623 16. Tine M, Kuhl H, Gagnaire PA, Louro B, Desmarais E, Martins RST, et al. European sea bass genome and its variation  
624 provide insights into adaptation to euryhalinity and speciation. *Nat Commun*. 2014;5: 5770.
- 625 17. Kousathanas A, Leuenberger C, Helfer J, Quinodoz M, Foll M. Likelihood-free inference in high-dimensional models.  
626 *Genetics*. 2016;203: 893–904.
- 627 18. Rougeux C, Gagnaire PA, Bernatchez L. Model-based demographic inference of introgression history in European  
628 whitefish species pairs. *J Evol Biol*. 2019;32: 806–817.
- 629 19. Kaplan NL, Hudson RR, Langley CH. The “hitchhiking effect” revisited. *Genetics*. 1989;123: 887–899.
- 630 20. Keinan A, Reich D. Human population differentiation is strongly correlated with local recombination rate. *PLoS Genet*.  
631 2010;6: e1000886.
- 632 21. Brandvain Y, Kenney AM, Flagel L, Coop G, Sweigart AL. Speciation and introgression between *Mimulus nasutus* and  
633 *Mimulus guttatus*. *PLoS Genet*. 2014;10: e1004410.
- 634 22. Barton N, Bengtsson BO. The barrier to genetic exchange between hybridising populations. *Heredity*. 1986;57: 357–  
635 376.
- 636 23. Nachman MW, Payseur BA. Recombination rate variation and speciation: Theoretical predictions and empirical results  
637 from rabbits and mice. *Philos Trans R Soc B Biol Sci*. 2012;367: 409–421.
- 638 24. Jiggins CD, Mcmillan O, Neukirchen W, Mallet J, Nw L. What can hybrid zones tell us about speciation? The case of  
639 *Heliconius erato* and *H. himera* (Lepidoptera: Nymphalidae). *Biol J Linn Soc*. 1996;59: 221–242.
- 640 25. McMillan WO, Jiggins CD, Mallet J. What initiates speciation in passion-vine butterflies? *Proc Natl Acad Sci U S A*.  
641 1997;94: 8628–8633.
- 642 26. Van Belleghem SM, Rastas P, Papanicolaou A, Martin SH, Arias CF, Supple MA, et al. Complex modular architecture  
643 around a simple toolkit of wing pattern genes. *Nat Ecol Evol*. 2017;1: 52.
- 644 27. Muñoz AG, Salazar C, Castaño J, Jiggins CD, Linares M. Multiple sources of reproductive isolation in a bimodal butterfly  
645 hybrid zone. *J Evol Biol*. 2010;23: 1312–1320.
- 646 28. Van Belleghem SM, Salazar C, Jiggins CD, Baquero M, Papa R, Counterman BA, et al. Patterns of Z chromosome  
647 divergence among *Heliconius* species highlight the importance of historical demography. *Mol Ecol*. 2018;27: 3852–  
648 3872.
- 649 29. Kronforst MR, Hansen MEB, Crawford NG, Gallant JR, Zhang W, Kulathinal RJ, et al. Hybridization reveals the evolving  
650 genomic architecture of speciation. *Cell Rep*. The Authors; 2013;5: 666–677.
- 651 30. Roux C, Fraise C, Romiguier J, Anciaux Y, Galtier N, Bierne N. Shedding light on the grey zone of speciation along a  
652 continuum of genomic divergence. *PLoS Biol*. 2016;14: e2000234.
- 653 31. Supple M, Papa R, Hines HM, McMillan WO, Counterman BA. Divergence with gene flow across a speciation continuum  
654 of *Heliconius* butterflies. *BMC Evol Biol*. 2015;15: 204.
- 655 32. Rougeux C, Bernatchez L, Gagnaire PA. Modeling the multiple facets of speciation-with-gene-flow toward inferring the  
656 divergence history of lake whitefish species pairs (*Coregonus clupeaformis*). *Genome Biol Evol*. 2017;9: 2057–2074.
- 657 33. Crawford JE, Riehle MM, Guelbeogo WM, Gneme A, Sagnon N, Vernick KD, et al. Reticulate speciation and barriers to  
658 introgression in the *Anopheles gambiae* species complex. *Genome Biol Evol*. 2015;7: 3116–3131.
- 659 34. Charlesworth B. Measures of divergence between populations and the effect of forces that reduce variability. *Mol Biol*  
660 *Evol*. 1998;15: 538–543.
- 661 35. Cruickshank TE, Hahn MW. Reanalysis suggests that genomic islands of speciation are due to reduced diversity, not

- 662 reduced gene flow. *Mol Ecol.* 2014;23: 3133–3157.
- 663 36. Counterman BA, Araujo-Perez F, Hines HM, Baxter SW, Morrison CM, Lindstrom DP, et al. Genomic hotspots for  
664 adaptation: the population genetics of Müllerian mimicry in *Heliconius erato*. *PLoS Genet.* 2010;6: e1000796.
- 665 37. Reed RD, Papa R, Martin A, Hinas HM, Counterman BA, Pard-Diaz C, et al. *optix* drives the repeated convergent  
666 evolution of butterfly wing pattern mimicry. *Science.* 2011;333: 1137–1141.
- 667 38. Martin SH, Davey JW, Jiggins CD. Evaluating the use of ABBA-BABA statistics to locate introgressed loci. *Mol Biol Evol.*  
668 2015;32: 244–257.
- 669 39. Pease JB, Hahn MW. Detection and polarization of introgression in a five-taxon phylogeny. *Syst Biol.* 2015;64: 651–662.
- 670 40. Latour Y, Perriat-Sanguinet M, Caminade P, Boursot P, Smadja CM, Ganem G. Sexual selection against natural hybrids  
671 may contribute to reinforcement in a house mouse hybrid zone. *Proc R Soc B Biol Sci.* 2013;281: 20132733.
- 672 41. Martin SH, Dasmahapatra KK, Nadeau NJ, Salazar C, Walters JR, Simpson F, et al. Genome-wide evidence for speciation  
673 with gene flow in *Heliconius* butterflies. *Genome Res.* 2013;23: 1817–1828.
- 674 42. Quek SP, Counterman BA, De Moura PA, Cardoso MZ, Marshall CR, McMillan WO, et al. Dissecting comimetic  
675 radiations in *Heliconius* reveals divergent histories of convergent butterflies. *Proc Natl Acad Sci U S A.* 2010;107: 7365–  
676 7370.
- 677 43. Berner D, Roesti M. Genomics of adaptive divergence with chromosome-scale heterogeneity in crossover rate. *Mol*  
678 *Ecol.* 2017;26: 6351–6369.
- 679 44. Janousek V, Munclinger P, Wang L, Teeter KC, Tucker PK. Functional Organization of the Genome May Shape the  
680 Species Boundary in the House Mouse. *Mol Biol Evol.* 2015;
- 681 45. Li H. Aligning sequence reads, clone sequences and assembly contigs with BWA-MEM. arXiv. 2013; 1303.3997v1.
- 682 46. Li H, Handsaker B, Wysoker A, Fennell T, Ruan J, Homer N, et al. The Sequence Alignment/Map format and SAMtools.  
683 *Bioinformatics.* 2009;25: 2078–2079.
- 684 47. Van der Auwera G a., Carneiro MO, Hartl C, Poplin R, del Angel G, Levy-Moonshine A, et al. From fastQ data to high-  
685 confidence variant calls: The genome analysis toolkit best practices pipeline. *Curr Protoc Bioinforma.* 2013;UNIT 11.10:  
686 1–33.
- 687 48. Hudson RR, Slatkin M, Maddison WP. Estimation of levels of gene flow from DNA sequence data. *Genetics.* 1992;132:  
688 583–589.
- 689 49. De Mita S, Siol M. EggLib: processing, analysis and simulation tools for population genetics and genomics. *BMC Genet.*  
690 *BioMed Central Ltd;* 2012;13: 27.
- 691 50. Price AL, Patterson NJ, Plenge RM, Weinblatt ME, Shadick N a, Reich D. Principal components analysis corrects for  
692 stratification in genome-wide association studies. *Nat Genet.* 2006;38: 904–909.
- 693 51. Price MN, Dehal PS, Arkin AP. FastTree 2 – Approximately maximum-likelihood trees for large alignments. *PLoS One.*  
694 2010;5: e9490.
- 695 52. Martin SH, Möst M, Palmer WJ, Salazar C, McMillan WO, Jiggins FM, et al. Natural selection and genetic diversity in the  
696 butterfly *Heliconius melpomene*. *Genetics.* 2016;203: 525–541.
- 697 53. Burnham KP, Anderson DR. Multimodel inference: Understanding AIC and BIC in model selection. *Sociol Methods Res.*  
698 2004;33: 261–304.
- 699 54. Keightley PD, Pinharanda A, Ness RW, Simpson F, Dasmahapatra KK, Mallet J, et al. Estimation of the spontaneous  
700 mutation rate in *Heliconius melpomene*. *Mol Biol Evol.* 2014;32: 239–243.
- 701 55. Martin SH, Eriksson A, Kozak KM, Manica A, Jiggins CD. Speciation in *Heliconius* Butterflies : Minimal Contact Followed  
702 by Millions of Generations of Hybridisation. *BioRxiv.* 2015; 1–24.
- 703 56. Ewing G, Hermisson J. MSMS: a coalescent simulation program including recombination, demographic structure and  
704 selection at a single locus. *Bioinformatics.* 2010;26: 2064–2065.
- 705 57. Rambaut A, Grass NC. Seq-Gen: an application for the Monte Carlo simulation of DNA sequence evolution along  
706 phylogenetic trees. *Bioinformatics.* 1997;13: 235–238.
- 707 58. Moest M, Van Belleghem SM, James J, Salazar C, Martin S, Barker S, et al. Selective sweeps on novel and introgressed  
708 variation shape mimicry loci in a butterfly adaptive radiation. *PLoS Biol.* 2020;18: e3000597.
- 709 59. Chan AH, Jenkins PA, Song YS. Genome-wide fine-scale recombination rate variation in *Drosophila melanogaster*. *PLoS*  
710 *Genet.* 2012;8.
- 711 60. Browning BL, Browning SR. Genotype imputation with millions of reference samples. *Am J Hum Genet. The American*  
712 *Society of Human Genetics;* 2016;98: 116–126.
- 713 61. Durand EY, Patterson N, Reich D, Slatkin M. Testing for ancient admixture between closely related populations. *Mol*  
714 *Biol Evol.* 2011;28: 2239–2252.
- 715
